# Supplementary material for: A Prediction Rule to Stratify Mortality Risk of Patients with Pulmonary Tuberculosis
Source: PLOS journal article supplement (doi:10.1371/journal.pone.0162797), 2016-09-16
Supplement: S1 (10.1371/journal.pone.0162797.s001) [file journal.pone.0162797.s001]

## S1 CHARMS - Relevant items to extract from individual studies in a systematic review of prediction models

| Domain                                       | Key items                                                                                                                                               | Reported on page #                                                                                                                                                                                                                                          |
|----------------------------------------------|---------------------------------------------------------------------------------------------------------------------------------------------------------|-------------------------------------------------------------------------------------------------------------------------------------------------------------------------------------------------------------------------------------------------------------|
| <b>SOURCE OF DATA</b>                        | Source of data (e.g., cohort, case-control, randomized trial participants, or registry data)                                                            | p.4 (retrospective cohort)                                                                                                                                                                                                                                  |
| <b>PARTICIPANTS</b>                          | Participant eligibility and recruitment method (e.g., consecutive participants, location, number of centers, setting, inclusion and exclusion criteria) | p.4 (inclusion criteria, number of centers, their setting and location), p.7 (study design)                                                                                                                                                                 |
|                                              | Participant description                                                                                                                                 | p.7, p.17 (Table 1)                                                                                                                                                                                                                                         |
|                                              | Details of treatments received, if relevant                                                                                                             | NA                                                                                                                                                                                                                                                          |
|                                              | Study dates                                                                                                                                             | p.7 (study design)                                                                                                                                                                                                                                          |
| <b>OUTCOME(S) TO BE PREDICTED</b>            | Definition and method for measurement of outcome                                                                                                        | p.5 (definition of death outcome and survival time), p.5-6 (logistic regression with 6-month mortality as the outcome measure)                                                                                                                              |
|                                              | Was the same outcome definition (and method for measurement) used in all patients?                                                                      | Yes                                                                                                                                                                                                                                                         |
|                                              | Type of outcome (e.g., single or combined endpoints)                                                                                                    | Single                                                                                                                                                                                                                                                      |
|                                              | Was the outcome assessed without knowledge of the candidate predictors (i.e., blinded)?                                                                 | No. Collection of all data was performed sequentially at the same time, which included date of death or date of loss of follow-up. However, definition of the clinical prediction model (ie, selection of relevant predictors) was performed independently. |
|                                              | Were candidate predictors part of the outcome (e.g., in panel or consensus diagnosis)?                                                                  | No                                                                                                                                                                                                                                                          |
|                                              | Time of outcome occurrence or summary of duration of follow-up                                                                                          | p.5 (event within 6 months)                                                                                                                                                                                                                                 |
| <b>CANDIDATE PREDICTORS (OR INDEX TESTS)</b> | Number and type of predictors (e.g., demographics, patient history, physical examination, additional testing, disease characteristics)                  | p.4-5 (data collection), p.17 (Table 1)                                                                                                                                                                                                                     |
|                                              | Definition and method for measurement of candidate predictors                                                                                           | p.4-5 (data collection), p.5 (criteria for redefining continuous variables into binary factors), p.17 (Table 1 footnote)                                                                                                                                    |
|                                              | Timing of predictor measurement (e.g., at patient presentation, at diagnosis, at treatment initiation)                                                  | p.5 (data collection at baseline, meaning at patient diagnosis)                                                                                                                                                                                             |
|                                              | Were predictors assessed blinded for outcome, and for each other (if relevant)?                                                                         | No. Collection of all data was performed sequentially at the same time, which included date of death or date of loss of follow-up. However, definition of the clinical prediction model (ie, selection of relevant predictors) was performed independently. |
|                                              | Handling of predictors in the modelling (e.g., continuous, linear, non-linear transformations or categorised)                                           | p.7-8 (development of a practical CPR to assess risk of death) and p.8-9 (development of scoring system TReAT to stratify the risk of death)                                                                                                                |
| <b>SAMPLE SIZE</b>                           | Number of participants and number of outcomes/events                                                                                                    | p.7 (study design) and Figure 1                                                                                                                                                                                                                             |
|                                              | Number of outcomes/events in relation to the number of candidate                                                                                        | p.7 (study design) and Figure 1                                                                                                                                                                                                                             |

|                                      |                                                                                                                                                                                                                                                                   |                                                                                                                                                                                                       |
|--------------------------------------|-------------------------------------------------------------------------------------------------------------------------------------------------------------------------------------------------------------------------------------------------------------------|-------------------------------------------------------------------------------------------------------------------------------------------------------------------------------------------------------|
| <b>MISSING DATA</b>                  | Number of participants with any missing value (include predictors and outcomes)                                                                                                                                                                                   | p.18 (Table 3, the sample size for both sets, n=539 and n=103, corresponds to the number of participants with any missing value)                                                                      |
|                                      | Number of participants with missing data for each predictor                                                                                                                                                                                                       | p.17 (Table 1)                                                                                                                                                                                        |
|                                      | Handling of missing data (e.g., complete-case analysis, imputation, or other methods)                                                                                                                                                                             | p.6 (Heckman's selection model)                                                                                                                                                                       |
| <b>MODEL DEVELOPMENT</b>             | Modelling method (e.g., logistic, survival, neural network, or machine learning techniques)                                                                                                                                                                       | p.5-6 (logistic regression)                                                                                                                                                                           |
|                                      | Modelling assumptions satisfied                                                                                                                                                                                                                                   | Yes. We believe that is implicit throughout the text (see p.5-8): binary dependent variable; large sample size with >10 cases per predictor; observations are independent, without multicollinearity. |
|                                      | Method for selection of predictors <b>for inclusion</b> in multivariable modelling (e.g., all candidate predictors, pre-selection based on unadjusted association with the outcome)                                                                               | p.5-8 (pre-selection based on unadjusted association with the outcome)                                                                                                                                |
|                                      | Method for selection of predictors <b>during multivariable modelling</b> (e.g., full model approach, backward or forward selection) and criteria used (e.g., p-value, Akaike Information Criterion)                                                               | p.5 and p.7-8 (stepwise backward selection)                                                                                                                                                           |
|                                      | Shrinkage of predictor weights or regression coefficients (e.g., no shrinkage, uniform shrinkage, penalized estimation)                                                                                                                                           | No shrinkage                                                                                                                                                                                          |
| <b>MODEL PERFORMANCE</b>             | Calibration (calibration plot, calibration slope, Hosmer-Lemeshow test) and Discrimination (C-statistic, D-statistic, log-rank) measures with confidence intervals                                                                                                | p.6 (Models were assessed for goodness-of-fit using receiving operator characteristic (ROC) curves and the Hosmer-Lemeshow test)                                                                      |
|                                      | Classification measures (e.g., sensitivity, specificity, predictive values, net reclassification improvement) and whether a-priori cut points were used                                                                                                           | p.8-9 and p.18 (Table 3)                                                                                                                                                                              |
| <b>MODEL EVALUATION</b>              | Method used for testing model performance: development dataset only (random split of data, resampling methods e.g. bootstrap or cross-validation, none) or separate external validation (e.g. temporal, geographical, different setting, different investigators) | p.9 and p.18 (Table 4 – external validation in a different setting)                                                                                                                                   |
|                                      | In case of poor validation, whether model was adjusted or updated (e.g., intercept recalibrated, predictor effects adjusted, or new predictors added)                                                                                                             | Validation performed well. There was no need for any adjustment or update.                                                                                                                            |
| <b>RESULTS</b>                       | Final and other multivariable models (e.g., basic, extended, simplified) presented, including predictor weights or regression coefficients, intercept, baseline survival, model performance measures (with standard errors or confidence intervals)               | p.8-9 (development of a scoring system, taking into account the weights derived from the regression coefficients; see also Table 2, p.18)                                                             |
|                                      | Any alternative presentation of the final prediction models, e.g., sum score, nomogram, score chart, predictions for specific risk subgroups with performance                                                                                                     | Figure 2C                                                                                                                                                                                             |
|                                      | Comparison of the distribution of predictors (including missing data) for development and validation datasets                                                                                                                                                     | Supplementary table 2                                                                                                                                                                                 |
| <b>INTERPRETATION AND DISCUSSION</b> | Interpretation of presented models (confirmatory, i.e., model useful for practice versus exploratory, i.e., more research needed)                                                                                                                                 | p.9-12                                                                                                                                                                                                |
|                                      | Comparison with other studies, discussion of generalizability, strengths and limitations.                                                                                                                                                                         | p.9-12                                                                                                                                                                                                |
